# Supplementary material for: Knotted fiber-based strain sensors with tunable sensitivity and a sensing region for monitoring wearable physiological signals and human motion
Source: Royal Society of Chemistry journal article supplement (doi:10.1039/d3tc01733h), 2023-01-01
Supplement: d3tc01733h1.pdf [file d3tc01733h1.pdf]

## Supporting Information

### Knotted Fiber-based Strain Sensors with Tunable Sensitivity and Sensing Region for Wearable Physiological Signals and Human Motion Monitoring

Weibing Zhong<sup>1</sup>, Weiwei Liu<sup>1</sup>, Yiming Ke<sup>2</sup>, Kangyu Jia<sup>1</sup>, Xiaojuan Ming<sup>1</sup>, Mufang Li<sup>1</sup>, Dong  
Wang<sup>1</sup>, Yan Chen<sup>3\*</sup>, Haiqing Jiang<sup>1\*</sup>

1. Key Laboratory of Textile Fiber and Products, Ministry of Education, Wuhan Textile  
University, Wuhan, China, 430200
2. College of Chemistry and Chemical Engineering, Donghua University, Shanghai, China,  
201620
3. Department of Anesthesiology, General Hospital of central theater command of PLA, China.  
430000

Corresponding author: Yan Chen, 2275548064@qq.com

Haiqing Jiang, hqjiang@wtu.edu.com

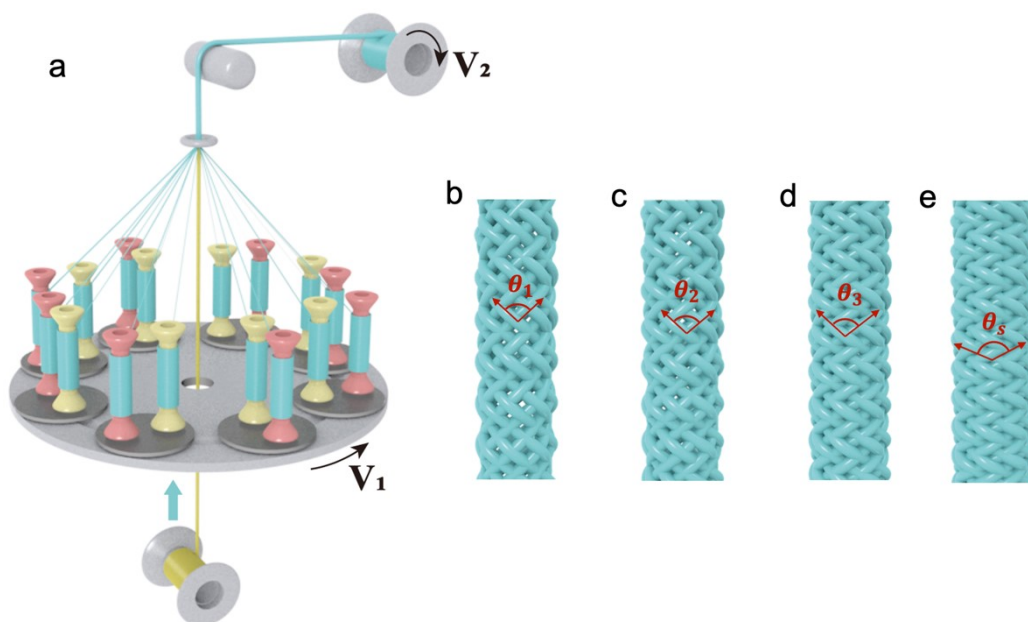

Figure S1. The illustration of the adjustment to the stretchability of the BSY

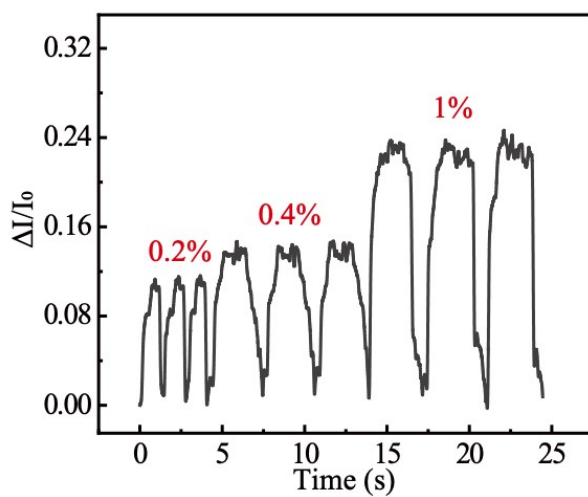

Figure S2. The minimum detection limit of the KFSS-60

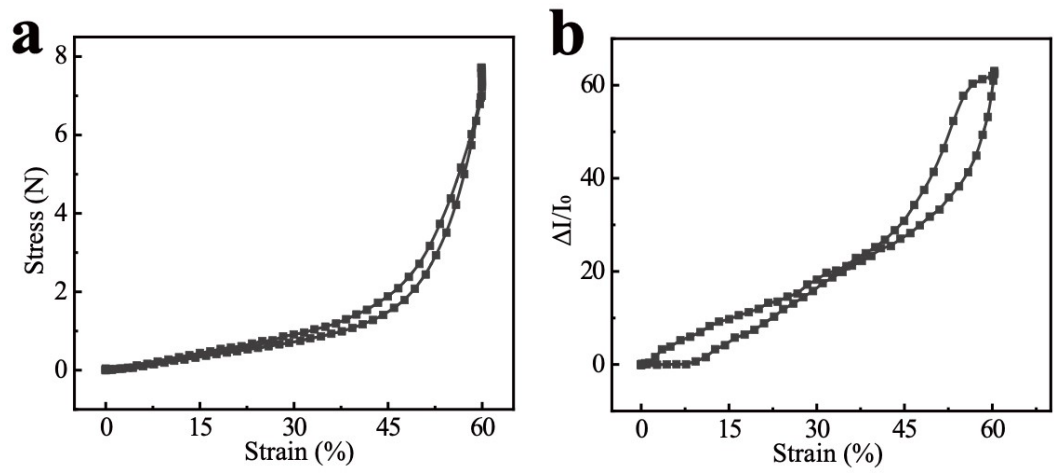

Figure S3. The mechanical and electrical hysteresis curves of the KFSS-60

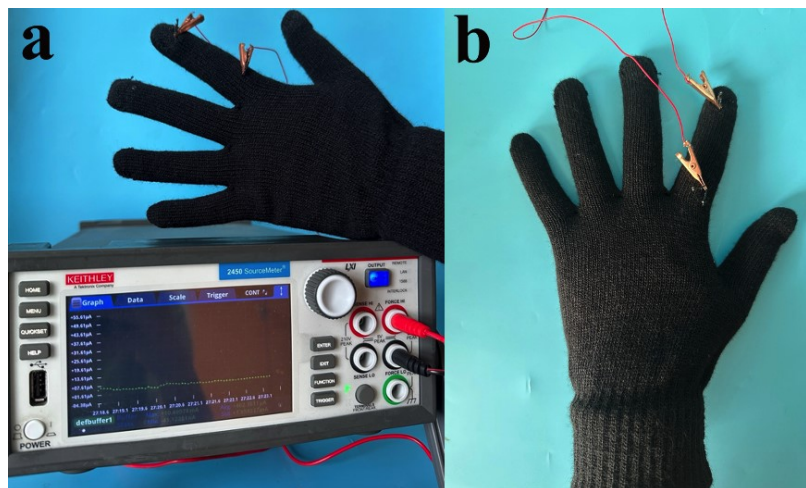

Figure S4. The human motion detection method of the KFSS
